# Supplementary material
Source: PubMed Central journal article supplement (PMC8022197)
Supplement: NIHMS1663935-supplement-1.pdf [file NIHMS1663935-supplement-1.pdf]

**Table S1:** Ingredient list of the inpatient omnivore menus, Related to **Figure 1**.

| <b>Menu A</b>                                                                                                                                                                                                  | <b>MenuB</b>                                                                                                                                                  |
|----------------------------------------------------------------------------------------------------------------------------------------------------------------------------------------------------------------|---------------------------------------------------------------------------------------------------------------------------------------------------------------|
| <u>Breakfast:</u><br>Scrambled Eggs<br>English Muffin<br>Butter<br>Jelly                                                                                                                                       | <u>Breakfast:</u><br>Plain yogurt<br>Jam<br>Peanut Butter<br>Apple slices                                                                                     |
| <u>Lunch:</u><br>Ham Sandwich on wheat bread with lettuce and mayonnaise<br>Broccoli and cheese soup<br>Apple slices<br>Pretzels                                                                               | <u>Lunch:</u><br>Turkey and American cheese Sandwich on Wheat<br>Salad greens with red cabbage, carrots, and Italian Dressing<br>Potato Chips<br>Fresh Grapes |
| <u>Snack:</u><br>American cheese<br>Saltines<br>Graham crackers                                                                                                                                                | <u>Snack:</u><br>Graham crackers<br>Peanut butter<br>Orange slices<br>Milk (skim)                                                                             |
| <u>Dinner:</u><br>Roasted Chicken Breast<br>Mashed Potatoes<br>Cooked Carrots<br>Salad greens with red cabbage, carrots, and Italian Dressing<br>White Dinner Roll with Butter<br>Pound Cake with Strawberries | <u>Dinner:</u><br>Spaghetti with Meatballs (beef) and Marinara Sauce<br>Salad greens with red cabbage, carrots, and Ranch Dressing<br>Shortbread cookies      |
| <u>Snack:</u><br>Rice cake<br>Peanut butter<br>Milk (2%)                                                                                                                                                       | <u>Snack:</u><br>Vanilla milkshake                                                                                                                            |

**Table S3:** PubMed PMID annotations for primary source literature describing the involvement of metabolites identified in **Figure 7B** in a bacterial metabolic pathway.

| Metabolite Name                      | HMDB ID   | References    |               |               |
|--------------------------------------|-----------|---------------|---------------|---------------|
| histamine                            | HMDB00870 | PMID 16960050 | PMID 15935495 |               |
| diaminopimelate                      | HMDB01370 | PMID 10881998 | PMID 10508663 |               |
| 4-acetamidobutanoate                 | HMDB03681 | PMID 29808030 |               |               |
| quinolinate                          | HMDB00232 | PMID 14700627 | PMID 23471408 |               |
| agmatine                             | HMDB01432 | PMID 7791519  | PMID 17099215 |               |
| xanthurenate                         | HMDB00881 | PMID 6029734  |               |               |
| N6-acetyllysine                      | HMDB00206 | PMID 26687465 |               |               |
| N6-acetyl-L-lysine                   | HMDB00206 | PMID 26687465 |               |               |
| hydrocinnamate<br>(phenylpropionate) | HMDB00764 | PMID 29168502 |               |               |
| pyridoxamine                         | HMDB01431 | PMID 16350099 | PMID 27890703 |               |
| N-acetylglutamine                    | HMDB06029 | PMID 30008290 |               |               |
| urocanic acid                        | HMDB00301 | PMID 16742726 | PMID 10443033 |               |
| indole                               | HMDB00738 | PMID 14569285 | PMID 20070374 |               |
| D-alany-D-alanine                    | HMDB03459 | PMID 26526529 | PMID 2386365  |               |
| acetytyrosine                        | HMDB00866 |               |               |               |
| pipecolic acid                       | HMDB00716 | PMID 16418868 |               |               |
| N-acetylhistamine                    | HMDB13253 | PMID 4225158  |               |               |
| 2-hydroxy-3-<br>methylpentanoate     | HMDB00317 | PMID 9873747  |               |               |
| phenyllactate                        | HMDB00779 | PMID 20660314 |               |               |
| indoleacetate                        | HMDB00197 | PMID 22447903 | PMID 27102537 | PMID 29168502 |
| indolelactate                        | HMDB00671 | PMID 6791576  | PMID 20925672 | PMID 29168502 |
| indole-3-propionate                  | HMDB02302 | PMID 29168502 |               |               |
| methylimidazole acetic<br>acid       | HMDB02820 | PMID 2228870  | PMID 13804909 |               |
| gentisate                            | HMDB00152 | PMID 23418504 | PMID 26394696 |               |
| ornithine                            | HMDB00214 | PMID 3534538  | PMID 16887608 |               |
| homovanillate                        | HMDB00118 | PMID 8586270  |               |               |
| leucylglycine                        | HMDB28929 | PMID 19734283 |               |               |
| formylmethionine                     | HMDB01015 | PMID 26866044 |               |               |
| 3-hydroxyanthranilic<br>acid         | HMDB01476 | PMID 14700627 |               |               |
| tryptamine                           | HMDB00303 | PMID 22447903 |               |               |
| imidazoleacetic acid                 | HMDB02024 | PMID 4925814  | PMID 11330718 |               |
| cadaverine                           | HMDB02322 | PMID 21684749 |               |               |
| citrulline                           | HMDB00904 | PMID 15939575 |               |               |
| imidazole propionate                 | HMDB02271 | PMID 30401435 | PMID 22933560 |               |
| 2-aminoadipate                       | HMDB00510 | PMID 16232683 |               |               |

**Table S4:** Characteristics of participants, Related to **STAR Methods**.

|                              | Vegan diet<br>(n=10)  | Omnivore diet<br>(n=10) | EEN diet<br>(n=10)    | P value |
|------------------------------|-----------------------|-------------------------|-----------------------|---------|
| Age (median<br>years, range) | 24.3<br>(20.5 – 32.2) | 27.0<br>(22.3 – 60.8)   | 32.2<br>(20.3 – 59.5) | 0.12    |
| Male sex                     | 6                     | 8                       | 6                     | 0.69    |
| White race                   | 9                     | 9                       | 9                     | >0.99   |
| Hispanic<br>ethnicity        | 0                     | 1                       | 1*                    | 0.75    |
| BMI                          | 21.3<br>(19.7 – 25.1) | 23.4<br>(20.5 – 28.2)   | 28.2<br>(20.3 – 35.4) | 0.003   |

[\*]Self-reported ethnicity information was not provided.



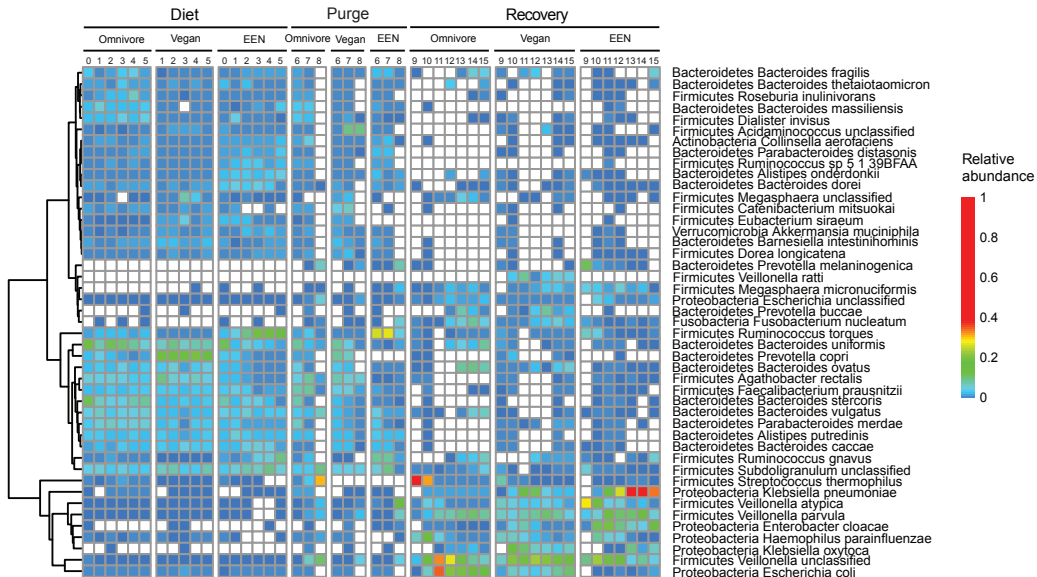

**Figure S2.** Relative abundance of the bacterial species that have a mean relative abundance of greater than 0.5% across all samples, Related to **Figure 2**. The relative abundances were then averaged for each diet and study day. The values represent the mean abundance of subjects for the annotated diet and study day.

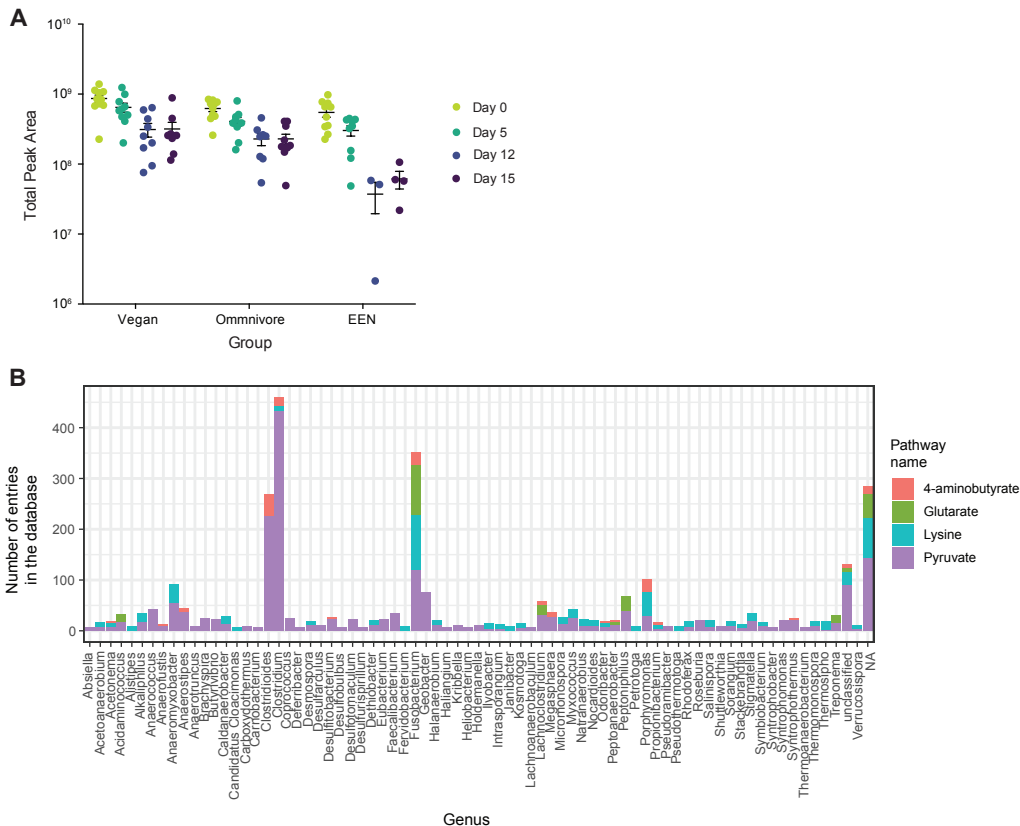

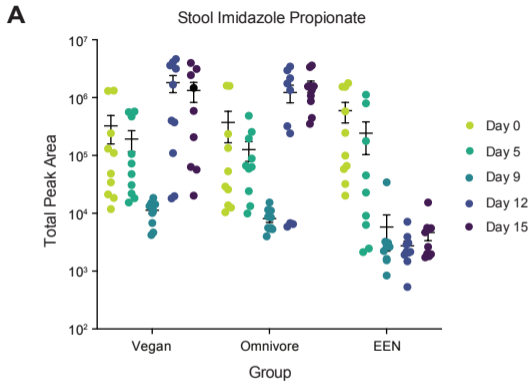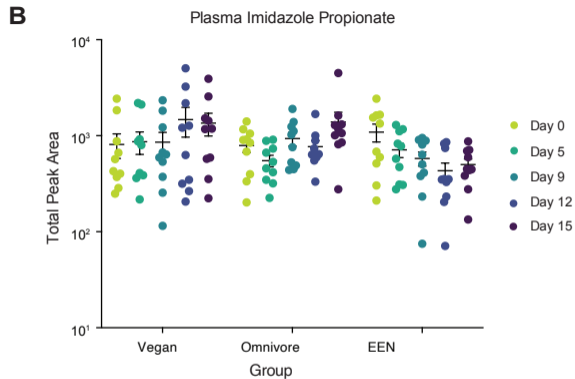

**Figure S4.** Imidazole propionate levels (total peak area) in stool and plasma in the vegan, omnivore, and EEN groups, Related to **Figure 7**. Data is presented as mean  $\pm$  SEM. Samples below the limit of detection are not shown. There are significant group ( $p=0.0043$ ), time ( $p=0.0002$ ), and group by time ( $p=0.0003$ ) effects in stool; however, there is only a significant group by time ( $p=0.006$ ) effect in plasma (mixed-effects modeling).

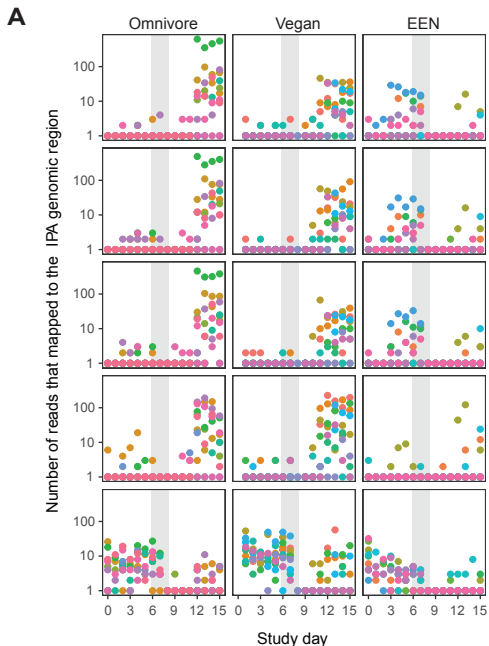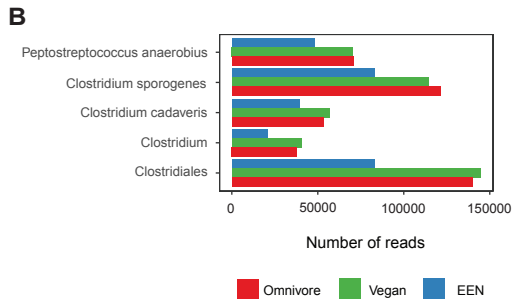

**Figure S5.** Relative abundance of 5 bacterial taxa previously described to produce IPA from tryptophan, Related to **Figure 7**. A) Reads were mapped to the genomic region responsible for IPA production for the five bacteria capable of reducing tryptophan to IPA. The number of reads that map to the region for each sample are represented in the figure. Each color is a different subject. B) The number of reads that map to the protein sequences of genes responsible for IPA production. If a sequence had multiple good hits to more than one protein sequence, the common ancestor of the originating organism was assigned.



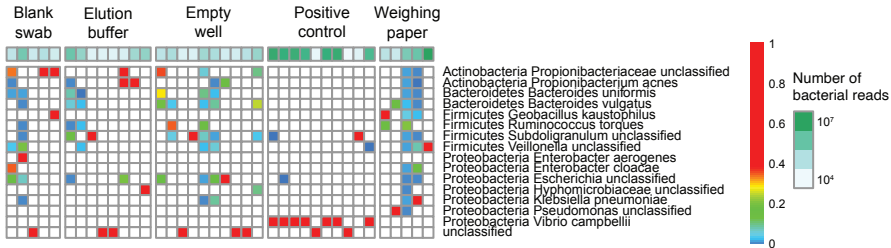

**Figure S6.** Common taxa in the negative and positive control samples, Related to **STAR Methods**. Positive controls consisted of DNA from *Vibrio campbellii* and Lambda phage. Elution buffer and wells without any sample DNA were used as negative controls to assess reagent contamination. Blank swabs and weighing paper were processed to assess environmental contamination.
